# Supplementary material for: UGT1A1Genetic Variations and a Haplotype Associated with Neonatal Hyperbilirubinemia in Indonesian Population
Source: Hindawi journal article supplement (doi:10.1155/2018/9425843), 2018-01-01
Supplement: f1 [file 9425843.f1.pdf]

## SUPPLEMENTARIES

**Table S1** – Primers for Exons of *UGT1A1* (NM\_000463)

| Exon | Variant     | Primer     | Sequences 5' → 3'       | Product Size (bp) |
|------|-------------|------------|-------------------------|-------------------|
| 1    | p.I47=      | UGT1A1_1_F | TCTCTGAAAGTGAAGTCCCTGC  | 700               |
|      |             | UGT1A1_1_R | CTCAAATTCCAGGCTGCATGG   |                   |
| 3    | p.Arg336Trp | UGT1A1_3_F | GCATCCACTTGTTTCATTAAGC  | 415               |
|      | p.Arg346Val | UGT1A1_3_R | ACCTATACATCCAATCCGCCC   |                   |
| 5    | p.His487Tyr | UGT1A1_5_F | TCTGGTAGTCTTCTTAAGCAGCC | 446               |
|      | p.Tyr486Asp | UGT1A1_5_R | AGTTTGGAATGACTAGGGAATGG |                   |

**Table S2:** Characteristic of Neonates in Cases and Controls Groups

| Characteristic               | Cases (N=116) | %    | Controls (N=115) | %    | p-value*     |
|------------------------------|---------------|------|------------------|------|--------------|
| <b>Sex</b>                   |               |      |                  |      | <b>0,950</b> |
| Male                         | 61            | 52,6 | 60               | 52,2 |              |
| Female                       | 55            | 47,4 | 55               | 47,8 |              |
| <b>Birth Weight (gram)</b>   |               |      |                  |      | <b>0,772</b> |
| Average (SD)                 | 3125 (345,6)  |      | 3138 (371,2)     |      |              |
| Range                        | 2.500–4.300   |      | 2.500–4.250      |      |              |
| <b>Feeding</b>               |               |      |                  |      | <b>0,483</b> |
| Breast milk                  | 94            | 81,0 | 98               | 85,2 |              |
| Formula                      | -             | -    | -                | -    |              |
| Mix of both                  | 22            | 19,0 | 17               | 14,3 |              |
| <b>Sibling with Jaundice</b> |               |      |                  |      | <b>0,319</b> |
| Yes                          | 26            | 22,4 | 19               | 16,4 |              |
| No                           | 90            | 77,6 | 96               | 80,6 |              |
| <b>ABO Blood Group</b>       | 18            | 15,5 | 9                | 7,75 | <b>0,065</b> |
| <b>Coombs Test Results</b>   |               |      |                  |      |              |
| Negative                     | 116           | 100  | 115              | 100  |              |
| Positive                     | -             |      | -0               |      |              |

\*) Chi-square, except Birth weight

**Table S3 - Characteristic of the Mothers**

| <b>Characteristic</b>  | <b>Cases<br/>(n=116)</b> | <b>%</b> | <b>Controls<br/>(n=115)</b> | <b>%</b> |
|------------------------|--------------------------|----------|-----------------------------|----------|
| <b>Age (Years)</b>     |                          |          |                             |          |
| Average (SD)           | 30 (6,1)                 | -        | 30,9 (5,8)                  | -        |
| Median                 | 30                       | -        | 31                          | -        |
| Range                  | 18–43                    | -        | 17–47                       | -        |
| <b>Parity</b>          |                          |          |                             |          |
| 1                      | 54                       | 46.6     | 41                          | 35.7     |
| 2–3                    | 50                       | 43.1     | 61                          | 53.0     |
| ≥ 4                    | 12                       | 10.3     | 13                          | 11.3     |
| Median                 | 2                        | 1.7      | 2                           | 1.7      |
| Range                  | 1–7                      | -        | 1–7                         | -        |
| <b>Delivery method</b> |                          |          |                             |          |
| Cesarean delivery      | 57                       | 49.1     | 87                          | 75.7     |
| Normal                 | 53                       | 45.7     | 28                          | 24.3     |
| Vacuum                 | 3                        | 2.6      | 0                           | 0        |
| Forceps                | 3                        | 2.6      | 0                           | 0        |
| <b>Consanguinity</b>   |                          |          |                             |          |
| Yes                    | 0                        | 0        | 0                           | 0        |
| No                     | 116                      | 100      | 115                         | 100      |

**Table S4 –Results of Complete Blood Count (CBC) Test**

|                          | <b>Cases<br/>(n=116)</b> | <b>Controls<br/>(n=115)</b> |
|--------------------------|--------------------------|-----------------------------|
| <b>Hemoglobin (g/dL)</b> |                          |                             |
| Average (SD)             | 16.52 (2.5)              | 15.91 (2.0)                 |
| Range                    | 9.5–22.90                | 11.6–21.6                   |
| <b>Hematocrit (%)</b>    |                          |                             |
| Average (SD)             | 46.04 (7.72)             | 44.68 (5.67)                |
| Median                   | 46.65                    | 43.65                       |
| Range                    | 27.0–63.10               | 31.7–59.6                   |
| <b>Leukocyte (μL)</b>    |                          |                             |
| Average (SD)             | 12.83 (3.60)             | 15.52 (5.20)                |
| Median                   | 12.47                    | 15.22                       |
| Range                    | 2.9–24.8                 | 3.7–32.3                    |
| <b>Reticulocyte</b>      |                          |                             |
| Average (SD)             | 3.55 (2.86)              | 4.40 (2.44)                 |
| Median                   | 2.94                     | 4.65                        |
| Range                    | 0.45–14.8                | 0.52–10.73                  |
| <b>Erythrocyte</b>       |                          |                             |
| Average (SD)             | 4.87 (1.12)              | 4.62 (0.59)                 |
| Median                   | 4.79                     | 4.56                        |
| Range                    | 2.69–13.40               | 3.49–6.35                   |

**Table S5 - Statistic of Deep-Targeted Sequencing Results**

|                                  | <b>Cases</b> | <b>Controls</b> |
|----------------------------------|--------------|-----------------|
|                                  | <b>N (%)</b> | <b>N (%)</b>    |
| Coverage (Average)               |              |                 |
| Variants Identified              | 521          | 498             |
| Variants with coverage $\geq 10$ | 481          | 448             |
| Deletion                         | 37(8)        | 26(6)           |
| Insertion                        | 21(4)        | 21(5)           |
| SNP                              | 423(88)      | 401(89)         |
| * UTRs                           | 344          | 349             |
| * Intronic                       | 38           | 31              |
| * Exonic                         | 40           | 21              |
| * Downstream of the gene         | 1            | 0               |

SNP : Single Nucleotide Polymorphism, UTRs: Untranslated Regions

**Table S6 – Risk Analysis of TA repeats in the promoter of *UGT1A1***

| <b>Allele</b>   | <b>Cases</b>   |          | <b>Controls</b> |          | <b>OR</b> | <b>95% CIs</b> | <b>p-value*</b> |
|-----------------|----------------|----------|-----------------|----------|-----------|----------------|-----------------|
|                 | <b>(n=232)</b> |          | <b>(n=230)</b>  |          |           |                |                 |
|                 | <b>n</b>       | <b>%</b> | <b>n</b>        | <b>%</b> |           |                |                 |
| TA <sub>6</sub> | 149            | 64.2     | 157             | 68.3     |           |                |                 |
| TA <sub>5</sub> | 58             | 25.0     | 51              | 22.2     | 1.19      | 0.77-1.86      | 0.41            |
| TA <sub>7</sub> | 25             | 10.8     | 22              | 9.5      | 1.20      | 0.65-2.22      | 0.57            |

\*Chi-Square
